# Supplementary material for: Optimization of Extraction Parameters for Antidiabetic Bioactive Compounds from Cherry Stems (Prunus avium)
Source: Research Square preprint supplement (doi:10.21203/rs.3.rs-5367646/v1), 2024-12-05
Supplement: Supplementary file 1 [file 6a4cb5e0e97035f2c5d7b34c.docx]

**Optimization of Extraction Parameters for Antidiabetic Bioactive Compounds from Cherry Stems (Prunus avium)**

**Beyza Tutku Bıçakcı1, Candan Güzelkuş1, Ayşenur Akgedik2, Gizem Öder1, Oguz Bayraktar1***

**1Department of Bioengineering, Ege University, Bornova, 35040, Izmir, Turkey**

**2Department of Food Engineering, Ege University, Bornova, 35040, Izmir, Turkey**

***Corresponding Author**

**Oguz Bayraktar**

**Email: oguz.bayraktar@ege.edu.tr**

**Supplemantary File**


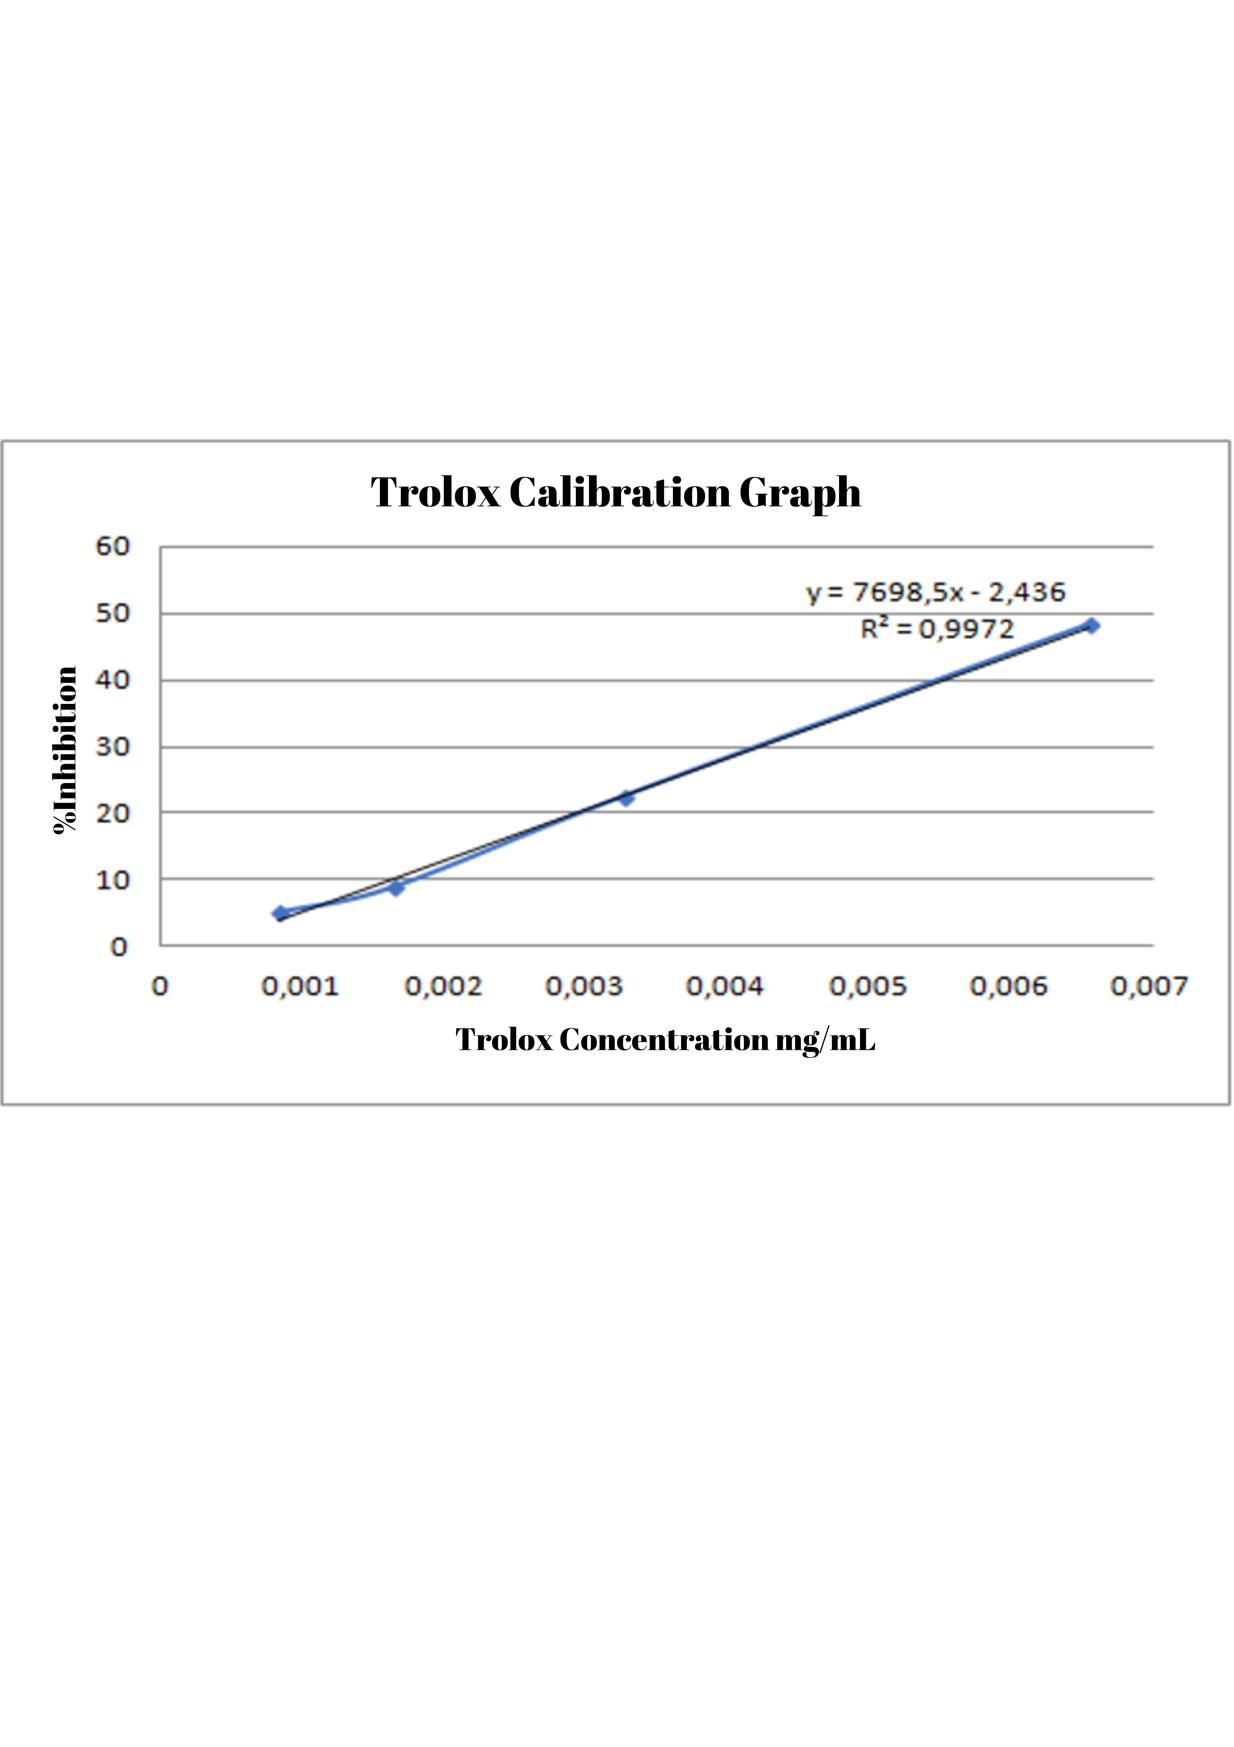


**Figure S1** Trolox Calibration Graph

**Figure S2** Gallic Acid Calibration Graph

**Table S1** ANOVA table of extracttion yield

| Source | Sum of Squares | df | Mean Square | F-value | p-value |  |
| --- | --- | --- | --- | --- | --- | --- |
| Model | 4851.25 | 8 | 606.41 | 8.63 | 0.0085 | significant |
| A-Solid/Liquid Ratio | 800.20 | 1 | 800.20 | 11.38 | 0.0150 |  |
| B-Solvent Type | 1344.47 | 1 | 1344.47 | 19.12 | 0.0047 |  |
| C-Time | 245.09 | 1 | 245.09 | 3.49 | 0.1111 |  |
| AB | 284.26 | 1 | 284.26 | 4.04 | 0.0911 |  |
| AC | 371.91 | 1 | 371.91 | 5.29 | 0.0611 |  |
| A² | 364.94 | 1 | 364.94 | 5.19 | 0.0629 |  |
| B² | 33.49 | 1 | 33.49 | 0.4764 | 0.5159 |  |
| C² | 1542.50 | 1 | 1542.50 | 21.94 | 0.0034 |  |
| Residual | 421.82 | 6 | 70.30 |  |  |  |
| Lack of Fit | 407.85 | 4 | 101.96 | 14.61 | 0.0651 | not significant |
| Pure Error | 13.96 | 2 | 6.98 |  |  |  |
| Cor Total | 5273.06 | 14 |  |  |  |  |

**Table S2** Fit statistics of extraction yield

| Std. Dev. | 8.38 |  | R² | 0.9200 |
| --- | --- | --- | --- | --- |
| Mean | 25.29 |  | **Adjusted R²** | 0.8133 |
| C.V. % | 33.16 |  | **Predicted R²** | 0.2207 |
|  |  |  | **Adeq Precision** | 7.0936 |


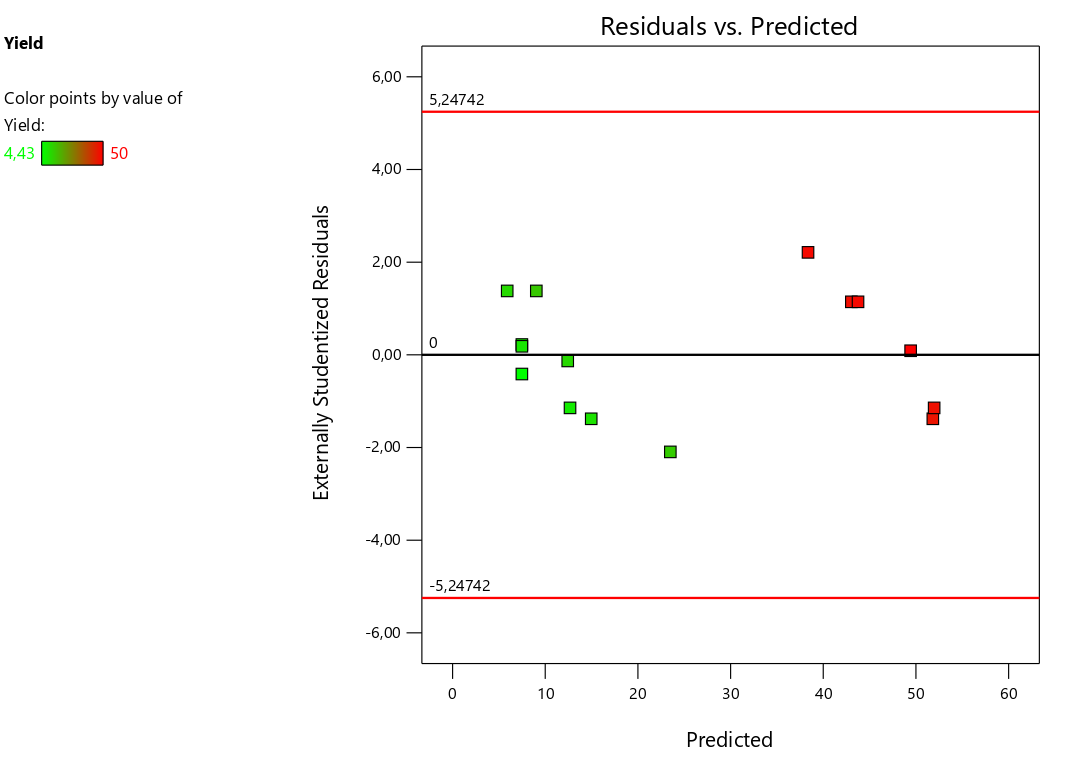


**Figure S3** Prediction plot for extraction yield against residue


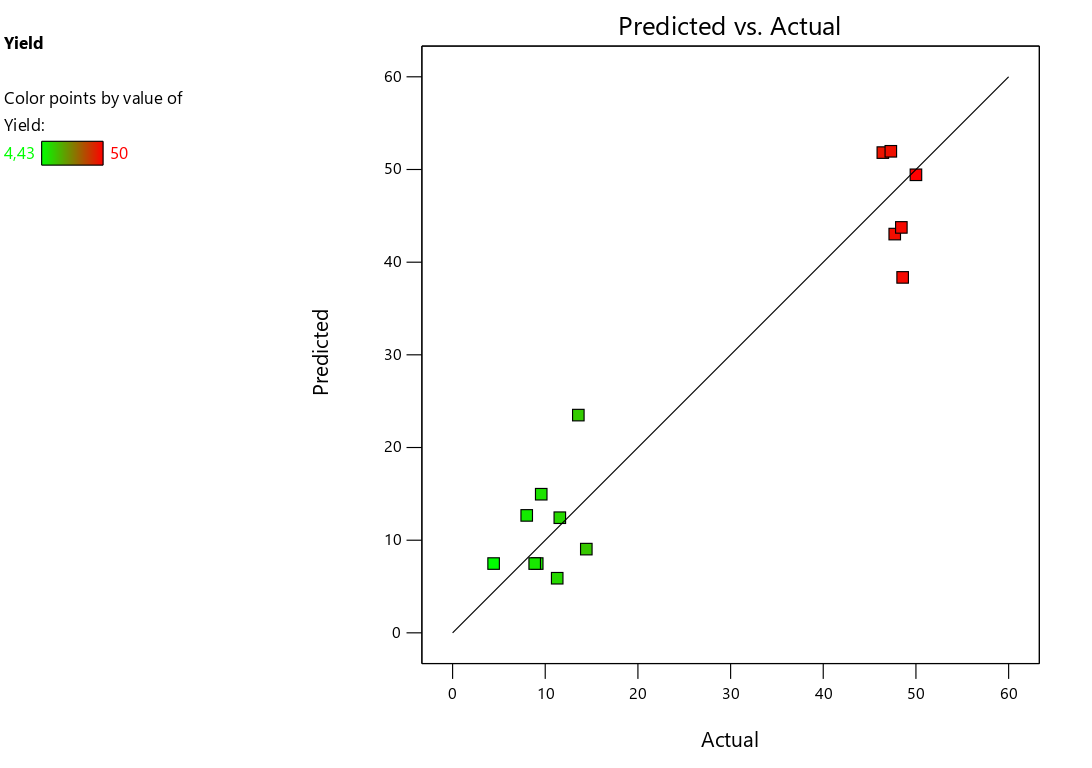


**Figure S4** Plot for experimental values against predicted values for extraction yield

**Table S3** ANOVA table of antioxidant capacity via ABTS method

| Source | Sum of Squares | df | Mean Square | F-value | p-value |  |
| --- | --- | --- | --- | --- | --- | --- |
| Model | 1014.89 | 9 | 112.77 | 54.15 | 0.0002 | significant |
| A-Solid/Liquid Ratio | 3.44 | 1 | 3.44 | 1.65 | 0.2550 |  |
| B-Solvent Type | 419.78 | 1 | 419.78 | 201.57 | < 0.0001 |  |
| C-Time | 2.67 | 1 | 2.67 | 1.28 | 0.3086 |  |
| AB | 9.36 | 1 | 9.36 | 4.50 | 0.0875 |  |
| AC | 38.63 | 1 | 38.63 | 18.55 | 0.0077 |  |
| B² | 336.30 | 1 | 336.30 | 161.48 | < 0.0001 |  |
| C² | 22.61 | 1 | 22.61 | 10.86 | 0.0216 |  |
| A²C | 12.25 | 1 | 12.25 | 5.88 | 0.0597 |  |
| AB² | 56.87 | 1 | 56.87 | 27.31 | 0.0034 |  |
| Residual | 10.41 | 5 | 2.08 |  |  |  |
| Lack of Fit | 5.71 | 3 | 1.90 | 0.8098 | 0.5938 | not significant |
| Pure Error | 4.70 | 2 | 2.35 |  |  |  |
| Cor Total | 1025.30 | 14 |  |  |  |  |

**Table S4** Fit statistics of antioxidant capacity via ABTS method

| Std. Dev. | 1.44 |  | R² | 0.9898 |
| --- | --- | --- | --- | --- |
| Mean | 34.60 |  | **Adjusted R²** | 0.9716 |
| C.V. % | 4.17 |  | **Predicted R²** | 0.7177 |
|  |  |  | **Adeq Precision** | 23.5881 |


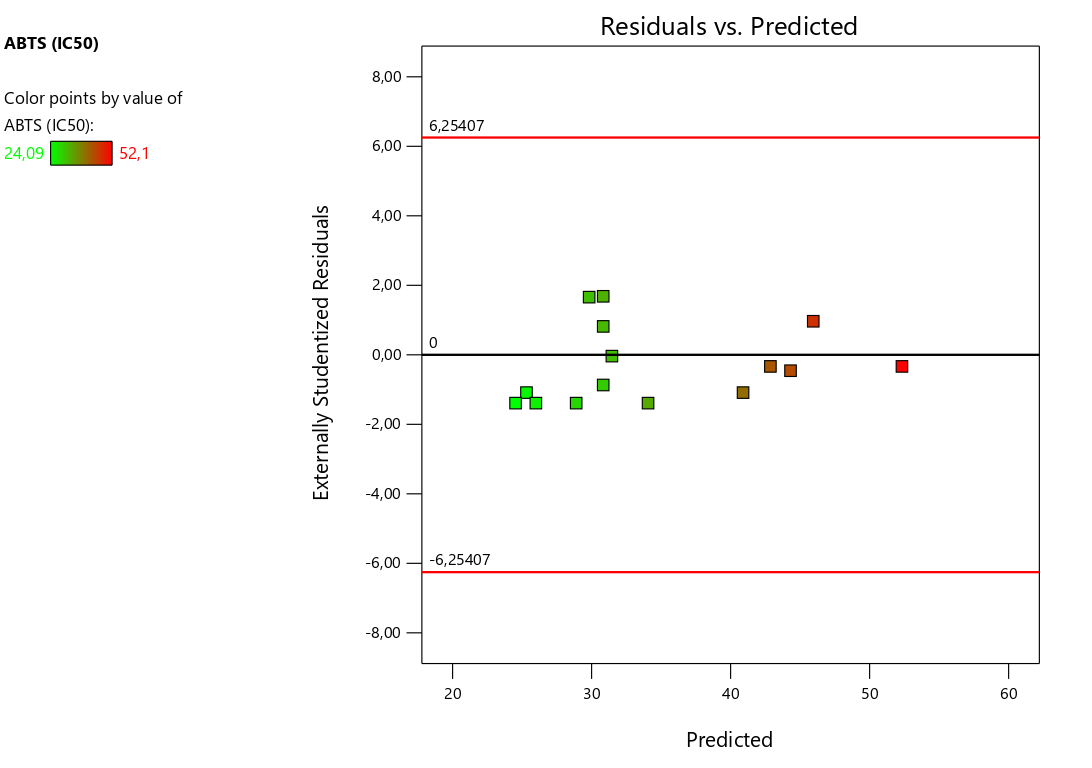


**Figure S5** Prediction plot of antioxidant capacity (ABTS) against residue


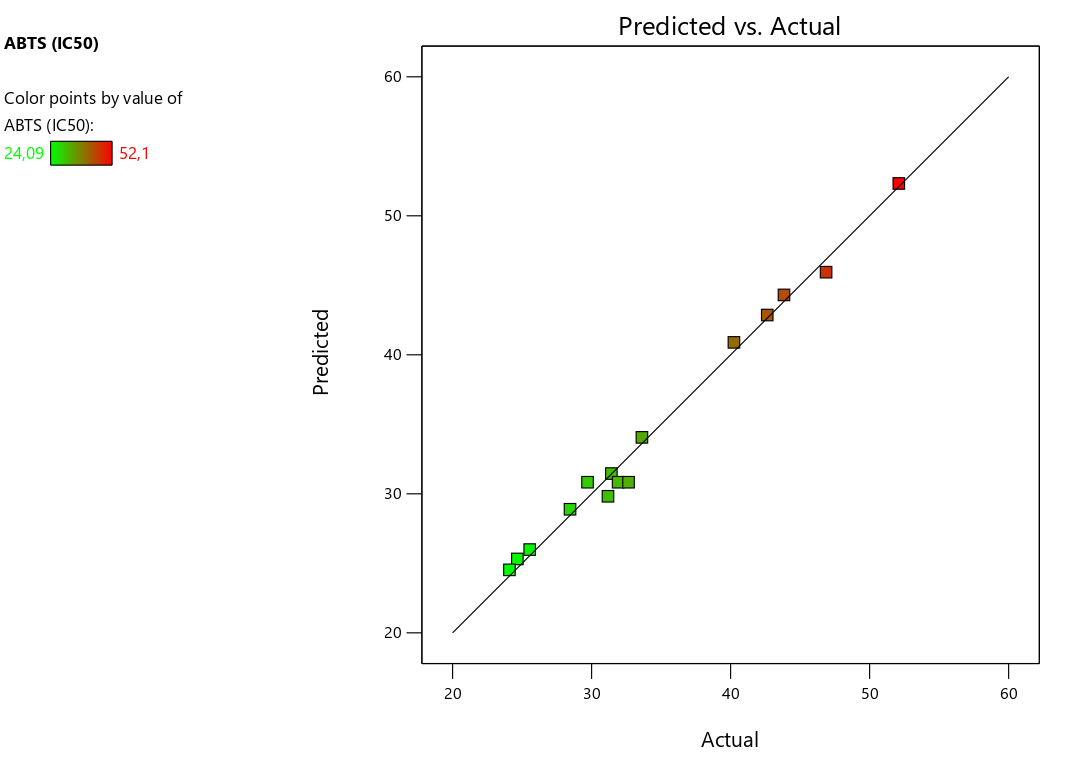


**Figure S6** Plot for experimental values against predicted values for antioxidant capacity (ABTS)

**Table S5** ANOVA table of antioxidant capacity via DPPH method

| Source | Sum of Squares | df | Mean Square | F-value | p-value |  |
| --- | --- | --- | --- | --- | --- | --- |
| Model | 1.558E+05 | 9 | 17306.05 | 7.22 | 0.0212 | significant |
| A-Solid/Liquid Ratio | 452.25 | 1 | 452.25 | 0.1888 | 0.6820 |  |
| B-Solvent Type | 84402.97 | 1 | 84402.97 | 35.23 | 0.0019 |  |
| C-Time | 24.33 | 1 | 24.33 | 0.0102 | 0.9236 |  |
| AB | 2994.28 | 1 | 2994.28 | 1.25 | 0.3144 |  |
| AC | 515.97 | 1 | 515.97 | 0.2154 | 0.6621 |  |
| BC | 1470.72 | 1 | 1470.72 | 0.6140 | 0.4688 |  |
| A² | 4923.01 | 1 | 4923.01 | 2.06 | 0.2111 |  |
| B² | 57335.55 | 1 | 57335.55 | 23.93 | 0.0045 |  |
| C² | 1423.57 | 1 | 1423.57 | 0.5943 | 0.4756 |  |
| Residual | 11977.43 | 5 | 2395.49 |  |  |  |
| Lack of Fit | 7926.77 | 3 | 2642.26 | 1.30 | 0.4616 | not significant |
| Pure Error | 4050.66 | 2 | 2025.33 |  |  |  |
| Cor Total | 1.677E+05 | 14 |  |  |  |  |

**Table S6** Fit statistics of antioxidant capacity via DPPH method

| Std. Dev. | 48.94 |  | R² | 0.9286 |
| --- | --- | --- | --- | --- |
| Mean | 338.93 |  | **Adjusted R²** | 0.8001 |
| C.V. % | 14.44 |  | **Predicted R²** | 0.1895 |
|  |  |  | **Adeq Precision** | 7.9419 |


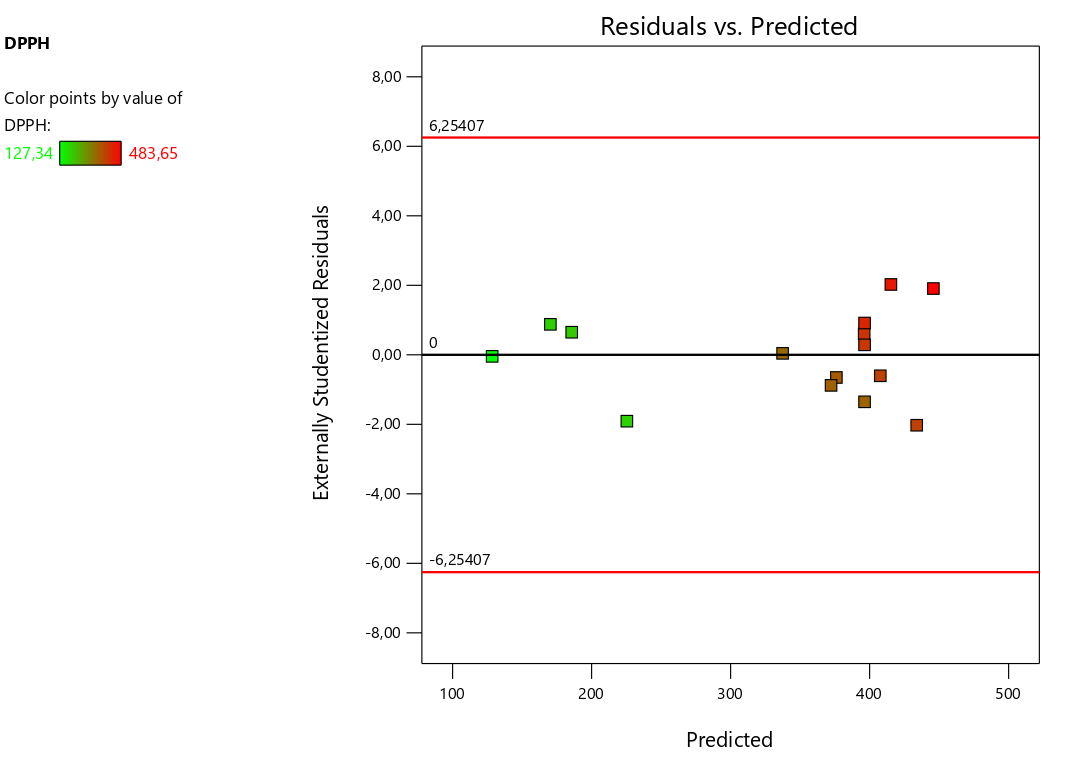


**Figure S7** Prediction plot of antioxidant capacity (DPPH) against residue


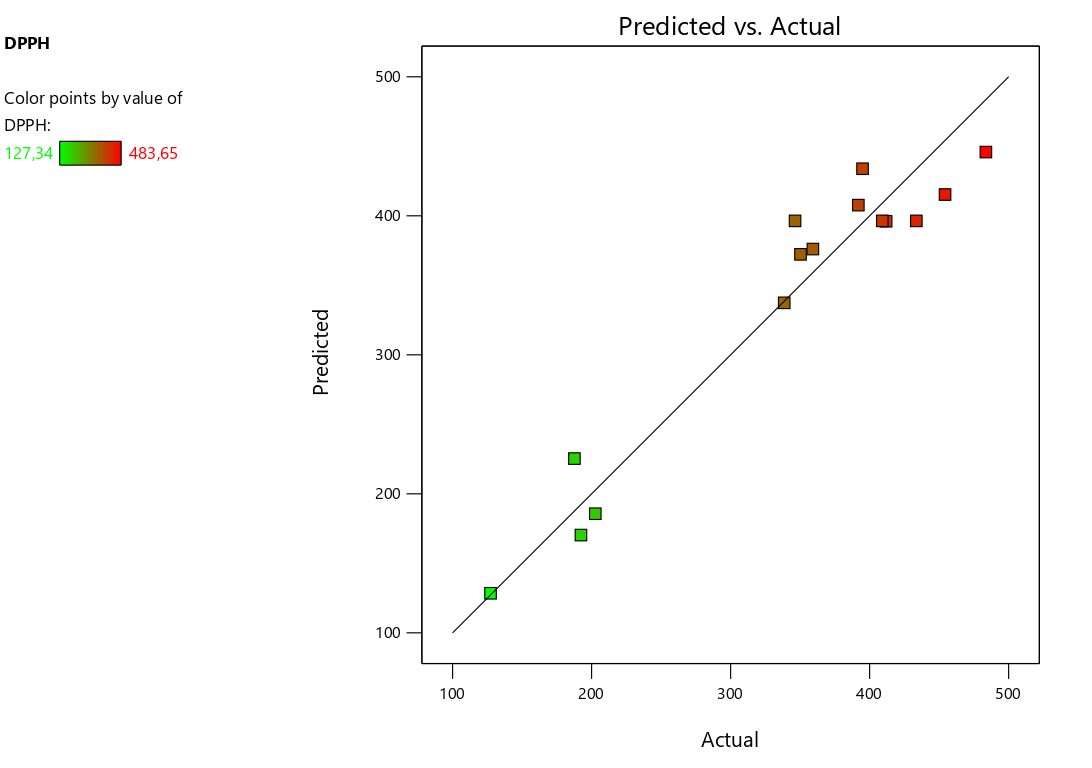


**Figure S8** Plot for experimental values against predicted values for antioxidant capacity (DPPH)

**Table S7** ANOVA table of total phenol content

| Source | Sum of Squares | df | Mean Square | F-value | p-value |  |
| --- | --- | --- | --- | --- | --- | --- |
| Model | 1.391E+05 | 9 | 15459.41 | 8.18 | 0.0162 | significant |
| A-Solid/Liquid Ratio | 2893.32 | 1 | 2893.32 | 1.53 | 0.2709 |  |
| B-Solvent Type | 45390.84 | 1 | 45390.84 | 24.02 | 0.0045 |  |
| C-Time | 98.98 | 1 | 98.98 | 0.0524 | 0.8280 |  |
| AB | 7811.02 | 1 | 7811.02 | 4.13 | 0.0977 |  |
| AC | 23.14 | 1 | 23.14 | 0.0122 | 0.9162 |  |
| BC | 1246.09 | 1 | 1246.09 | 0.6595 | 0.4537 |  |
| A² | 2783.35 | 1 | 2783.35 | 1.47 | 0.2791 |  |
| B² | 75651.03 | 1 | 75651.03 | 40.04 | 0.0015 |  |
| C² | 1493.83 | 1 | 1493.83 | 0.7906 | 0.4147 |  |
| Residual | 9447.75 | 5 | 1889.55 |  |  |  |
| Lack of Fit | 6607.44 | 3 | 2202.48 | 1.55 | 0.4151 | not significant |
| Pure Error | 2840.31 | 2 | 1420.15 |  |  |  |
| Cor Total | 1.486E+05 | 14 |  |  |  |  |

**Table S8** Fit statistics of total phenol content

| Std. Dev. | 43.47 |  | R² | 0.9364 |
| --- | --- | --- | --- | --- |
| Mean | 284.47 |  | **Adjusted R²** | 0.8220 |
| C.V. % | 15.28 |  | **Predicted R²** | 0.2455 |
|  |  |  | **Adeq Precision** | 8.0924 |


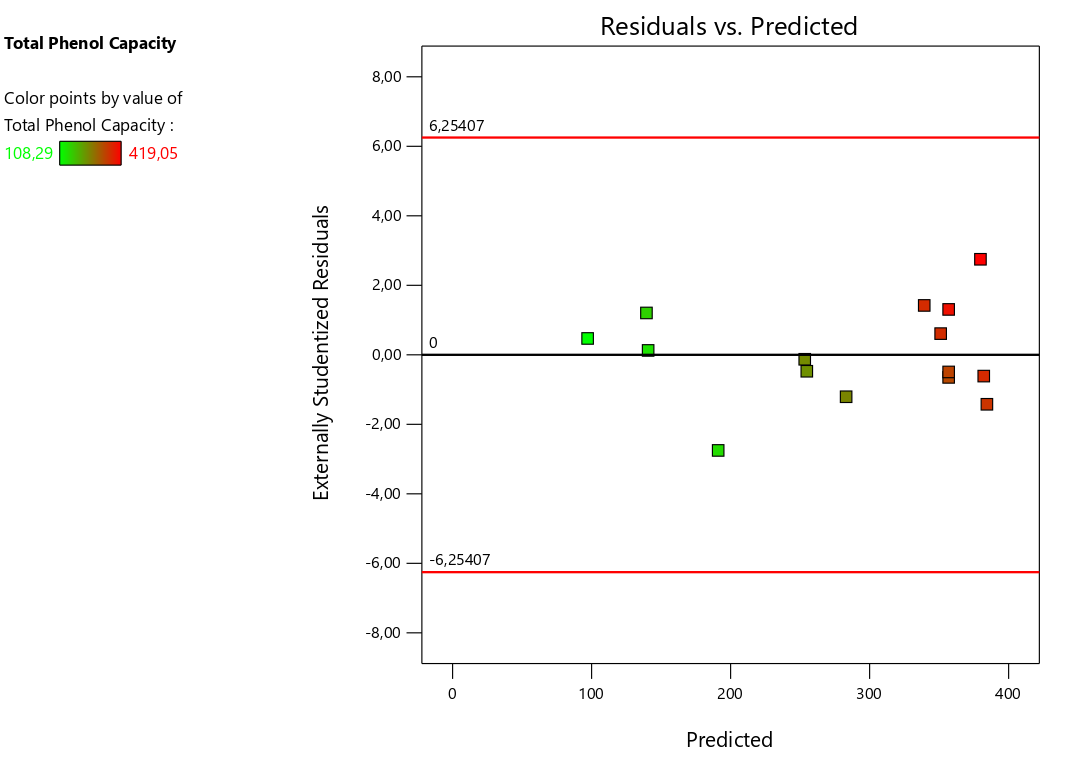


**Figure S9** Prediction plot of total phenol content


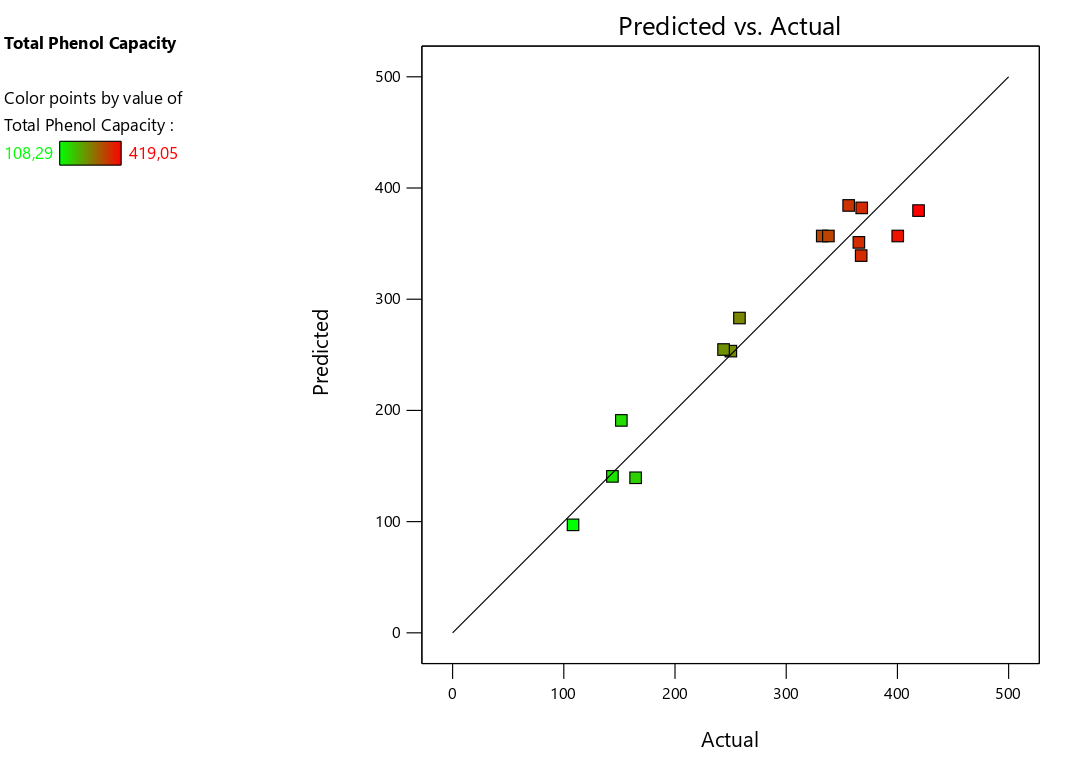


**Figure S10** Plot for experimental values against predicted values for phenol content

**Table S9** ANOVA table of alpha glucosidase inhibition

| Source | Sum of Squares | df | Mean Square | F-value | p-value |  |
| --- | --- | --- | --- | --- | --- | --- |
| Model | 6640.09 | 11 | 603.64 | 222.57 | 0.0004 | significant |
| A-Solid/Liquid Ratio | 5.45 | 1 | 5.45 | 2.01 | 0.2513 |  |
| B-Solvent Type | 204.92 | 1 | 204.92 | 75.56 | 0.0032 |  |
| C-Time | 73.87 | 1 | 73.87 | 27.24 | 0.0137 |  |
| AB | 385.93 | 1 | 385.93 | 142.29 | 0.0013 |  |
| BC | 103.12 | 1 | 103.12 | 38.02 | 0.0086 |  |
| A² | 564.26 | 1 | 564.26 | 208.05 | 0.0007 |  |
| B² | 753.15 | 1 | 753.15 | 277.69 | 0.0005 |  |
| C² | 637.31 | 1 | 637.31 | 234.98 | 0.0006 |  |
| A²B | 992.35 | 1 | 992.35 | 365.89 | 0.0003 |  |
| A²C | 33.05 | 1 | 33.05 | 12.19 | 0.0397 |  |
| AB² | 211.56 | 1 | 211.56 | 78.01 | 0.0031 |  |
| Residual | 8.14 | 3 | 2.71 |  |  |  |
| Lack of Fit | 0.0020 | 1 | 0.0020 | 0.0005 | 0.9842 | not significant |
| Pure Error | 8.13 | 2 | 4.07 |  |  |  |
| Cor Total | 6648.22 | 14 |  |  |  |  |

**Table S10** Fit statistics of alpha glucosidase inhibition

| Std. Dev. | 1.65 |  | R² | 0.9988 |
| --- | --- | --- | --- | --- |
| Mean | 18.92 |  | **Adjusted R²** | 0.9943 |
| C.V. % | 8.71 |  | **Predicted R²** | NA⁽¹⁾ |
|  |  |  | **Adeq Precision** | 55.5397 |


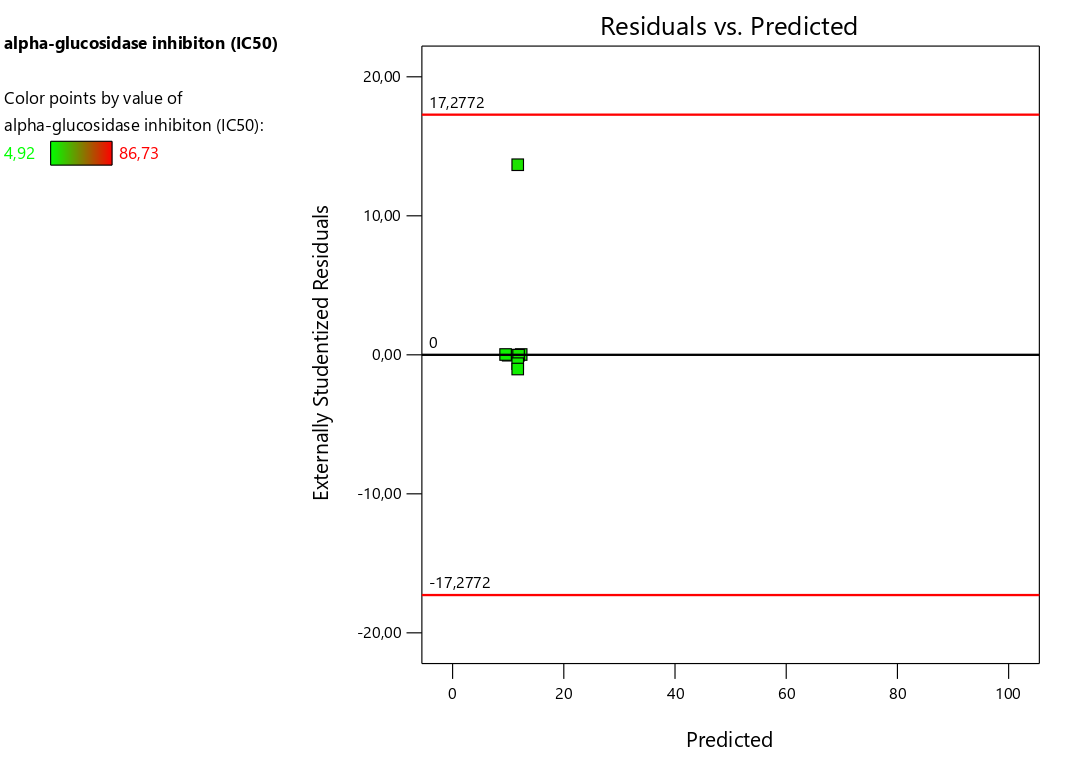


**Figure S11** Prediction plot of alpha glucosidase inhibition


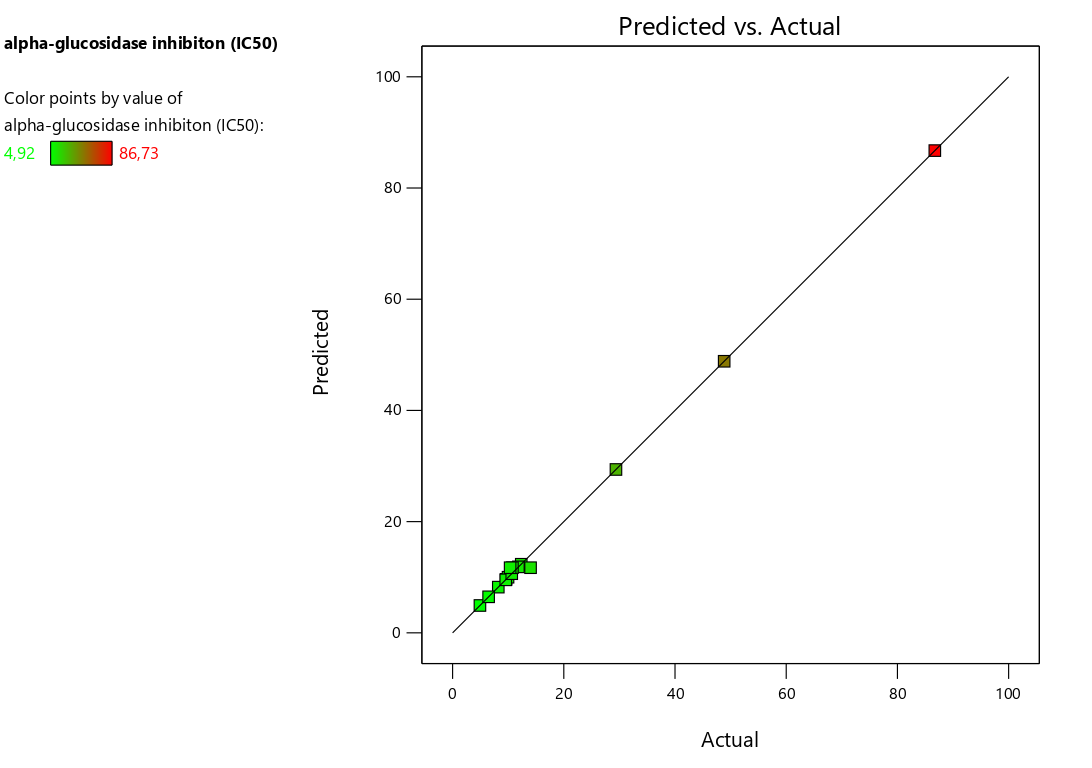


**Figure S12** Expected values plot for experimental values against predicted values alpha-glucosidase inhibition

**Figure S13** Correlation between the total phenol content and antioxidant capacity (ABTS and DPPH)

**Table S11** IC50 values of total antioxidant capacity (DPPH)

| Run number | DPPH (IC50)  (μg/mL) |
| --- | --- |
| 1 | 221.82 |
| 2 | 78.13 |
| 3 | 54.18 |
| 4 | 78.76 |
| 5 | 176.04 |
| 6 | 61.24 |
| 7 | 62.44 |
| 8 | 81.20 |
| 9 | 131.74 |
| 10 |  |
| 11 | 53.24 |
| 12 | 25.78 |
| 13 | 40.08 |
| 14 | 141.71 |
| 15 | 74.37 |
